# Supplementary material for: The Association of HHV-6 and the TNF-α (-308G/A) Promotor with Major Depressive Disorder Patients and Healthy Controls in Thailand
Source: MDPI journal article supplement (doi:10.3390/v15091898), 2023-09-08

**Supplement Table S1.** Risk factor of MDD (HHV-6 negative 44 cases)

| Factor                                | Group                          | N  | MDD        | Healthy    | P-value | Odds ratio      |
|---------------------------------------|--------------------------------|----|------------|------------|---------|-----------------|
| Sex                                   | Male                           | 13 | 4(30.77%)  | 9(69.23%)  | 0.184   | 0.433           |
|                                       | Female                         | 79 | 40(50.63%) | 39(49.37%) |         | (0.123-1.524)   |
| Education level                       | No-High Vocational Certificate | 19 | 13(68.42%) | 6(31.58%)  | 0.044   | 2.935           |
|                                       | >High Vocational Certificate   | 73 | 31(42.47%) | 42(57.53%) |         | (1429-8.224)    |
| Income/month (\$)                     | 300-1000                       | 53 | 32(60.38%) | 21(39.62%) | 0.005   | 2.935           |
|                                       | No-299                         | 39 | 12(30.77%) | 27(69.23%) |         | (1.004-8.583)   |
| Familial relationship                 | Quarrel                        | 10 | 10(100%)   | 0(0%)      | 0.000   | 2.412           |
|                                       | No Quarrel                     | 82 | 34(41.46%) | 48(58.54%) |         | (1.865-3.119)   |
| BMI                                   | >25                            | 31 | 19(61.29%) | 12(38.71%) | 0.065   | 2.280 (0.941-   |
|                                       | <25                            | 61 | 25(40.98%) | 36(59.02%) |         | 5.523)          |
| Congenital disease                    | Yes                            | 36 | 30(83.33%) | 6(16.67%)  | 0.000   | 15.000          |
|                                       | No                             | 56 | 14(25.00%) | 42(75.00%) |         | (5.171-43.511)  |
| Five main food groups                 | No                             | 42 | 25(59.52%) | 17(40.48%) | 0.040   | 2.399           |
|                                       | Yes                            | 50 | 19(38.00%) | 31(62.00%) |         | (0.881-4.642)   |
| Exercise                              | No                             | 46 | 26(56.52%) | 20(43.48%) | 0.095   | 2.022           |
|                                       | 1-7 times/week                 | 46 | 18(39.13%) | 28(60.87%) |         | (0.881-4.642)   |
| Fresh fruit consumption (per week)    | No-1 to 2 times                | 50 | 24(48.00%) | 26(52.00%) | 0.971   | 1.015           |
|                                       | 3-7 times                      | 42 | 20(47.62%) | 22(52.38%) |         | (0.447-2.308)   |
| Vegetable consumption (per week)      | No-1 to 2 times                | 27 | 13(48.15%) | 14(51.85%) | 0.968   | 1.018           |
|                                       | 3-7 times                      | 65 | 31(47.69%) | 34(52.31%) |         | (0.415-2.500)   |
| High-fat food consumption (per week)  | No-1 to 2 times                | 48 | 19(39.58%) | 29(60.42%) | 0.098   | 0.498           |
|                                       | 3-7 times                      | 44 | 25(56.82%) | 19(43.18%) |         | (0.217-1.143)   |
| Fermented food consumption (per week) | 3-7 times                      | 9  | 7(77.78%)  | 2(22.22%)  | 0.058   | 4.351           |
|                                       | No-1 to 2 times                | 83 | 37(44.58%) | 46(55.42%) |         | (0.853-22.2081) |
| Cleaning of water for consumption     | No                             | 27 | 7(25.93%)  | 20(74.07%) | 0.007   | 1.720           |
|                                       | Yes                            | 65 | 37(56.92%) | 28(43.08%) |         | (1.203-2.459)   |
| Tap water used for brushing teeth     | Yes                            | 79 | 42(53.16%) | 37(46.84%) | 0.012   | 6.243           |
|                                       | No                             | 13 | 2(15.38%)  | 11(84.62%) |         | (1.299-30.012)  |
| Alcohol consumption                   | Yes                            | 68 | 32(47.06%) | 36(52.94%) | 0.804   | 0.889           |
|                                       | No                             | 24 | 12(50.00%) | 12(50.00%) |         | (0.350-2.255)   |
| Secondhand smoke exposure             | Yes                            | 36 | 26(72.22%) | 10(27.78%) | 0.000   | 5.489           |
|                                       | No                             | 56 | 18(32.14%) | 38(67.86%) |         | (2.187-13.773)  |

**Supplement Table S2.** Risk factor of MDD (HHV-6 positive 15 cases)

| Factor                                | Group                          | Healthy | MDD        | Healthy    | P-value | Odds ratio     |
|---------------------------------------|--------------------------------|---------|------------|------------|---------|----------------|
| Sex                                   | Male                           | 5       | 2(40.00%)  | 3(60.00%)  | 0.635   | 0.500          |
|                                       | Female                         | 21      | 12(57.14%) | 9(42.86%)  |         | (0.069-3.647)  |
| Education level                       | No-High Vocational Certificate | 4       | 3(75.00%)  | 1(25.00%)  | 0.605   | 2.750          |
|                                       | >High Vocational Certificate   | 23      | 12(52.17%) | 11(47.83%) |         | (0.248-30.512) |
| Income/month (\$)                     | 300-1000                       | 14      | 9(64.29%)  | 5(35.71%)  | 0.449   | 2.100          |
|                                       | No-299                         | 13      | 6(46.15%)  | 7(53.85%)  |         | (0.448-9.836)  |
| Familial relationship                 | Quarrel                        | 5       | 5(100.00%) | 0(0%)      | 0.047   | 2.222          |
|                                       | No Quarrel                     | 22      | 10(45.45%) | 12(54.55%) |         | (1.392-3.477)  |
| BMI                                   | >25                            | 10      | 7(70.00%)  | 3(30.00%)  | 0.424   | 2.625          |
|                                       | <25                            | 17      | 8(47.06%)  | 9(52.94%)  |         | (0.502-13.725) |
| Congenital disease                    | Yes                            | 17      | 12(70.59%) | 5(29.41%)  | 0.057   | 5.600          |
|                                       | No                             | 10      | 3(30.00%)  | 7(70.00%)  |         | (1.015-30.904) |
| Five main food groups                 | No                             | 16      | 8(50.00%)  | 8(50.00%)  | 0.696   | 0.571          |
|                                       | Yes                            | 11      | 7(63.64%)  | 4(36.36%)  |         | (0.119-2.751)  |
| Exercise                              | No                             | 13      | 11(84.62%) | 2(15.38%)  | 0.006   | 13.750         |
|                                       | 1-7 times/week                 | 14      | 4(28.57%)  | 10(71.43%) |         | (2.054-92.039) |
| Fresh fruit consumption (per week)    | No-1 to 2 times                | 17      | 10(58.82%) | 7(41.18%)  | 0.706   | 1.424          |
|                                       | 3-7 times                      | 10      | 5(50.00%)  | 5(50.00%)  |         | (0.297-6.877)  |
| Vegetable consumption (per week)      | No-1 to 2 times                | 13      | 7(53.85%)  | 6(46.15%)  | 1.000   | 0.875          |
|                                       | 3-7 times                      | 14      | 8(57.14%)  | 6(42.86%)  |         | (0.191-3.999)  |
| High-fat food consumption (per week)  | No-1 to 2 times                | 20      | 11(55.00%) | 9(45.00%)  | 1.000   | 0.917          |
|                                       | 3-7 times                      | 7       | 4(57.14%)  | 3(42.86%)  |         | (0.161-5.207)  |
| Fermented food consumption (per week) | 3-7 times                      | 3       | 3(100.00%) | 0(0%)      | 0.231   | 2.000          |
|                                       | No-1 to 2 times                | 24      | 12(50.00%) | 12(50.00%) |         | (1.341-2.984)  |
| Cleaning of water for consumption     | No                             | 9       | 6(66.67%)  | 3(33.33%)  | 0.683   | 2.000          |
|                                       | Yes                            | 18      | 9(50.00%)  | 9(50.00%)  |         | (0.378-10.578) |
| Tap water used for brushing teeth     | Yes                            | 22      | 14(63.64%) | 8(36.36%)  | 0.139   | 7.000          |
|                                       | No                             | 5       | 1(20.00%)  | 4(80.00%)  |         | (0.663-73.929) |
| Alcohol consumption                   | Yes                            | 17      | 9(52.94%)  | 8(47.06%)  | 1.000   | 0.750          |
|                                       | No                             | 10      | 6(60.00%)  | 4(40.00%)  |         | (0.154-3.654)  |
| Secondhand smoke exposure             | Yes                            | 10      | 7(70.00%)  | 3(30.00%)  | 0.424   | 2.625          |
|                                       | No                             | 17      | 8(47.06%)  | 9(52.94%)  |         | (0.502-13.725) |

Supplement Figure S1. Prevalence of HHV-6 infection and MDD patients in Asia.

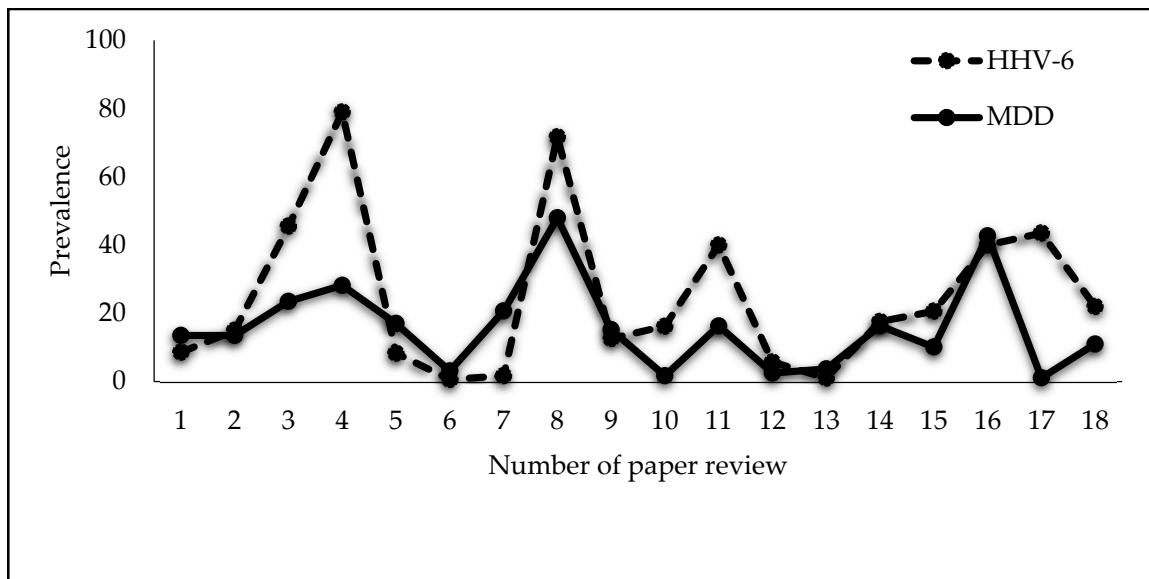

Supplement: s1 [file s1]
